# Supplementary material for: Preparation of LDO@TiO 2 core–shell nanosheets for enhanced photocatalytic degradation of organic pollution
Source: Royal Society of Chemistry journal article supplement (doi:10.1039/d1dt03302f), 2021-01-01
Supplement: d1dt03302f1.pdf [file d1dt03302f1.pdf]

## Supplementary Information for

# Preparation of LDO@TiO<sub>2</sub> core-shell nanosheets for enhanced photocatalytic degradation of organic pollutions

Can Wang<sup>a</sup>, Ruikang Zhang<sup>a,\*</sup>, Yucong Miao<sup>b</sup>, Qihui Xue<sup>a</sup>, Borong Yu<sup>a</sup>, Yuanzhe Gao<sup>a</sup>, Zhan-gang

Han<sup>a</sup>, Mingfei Shao<sup>b</sup>

<sup>a</sup>Hebei Key Laboratory of Organic Functional Molecules, College of Chemistry and Materials Science, Hebei Normal University, Shijiazhuang, Hebei 050024, China.

<sup>b</sup>State Key Laboratory of Chemical Resource Engineering, Beijing University of Chemical Technology, Beijing 100029, China

E-mail: zhangruikang@hebtu.edu.cn

## Supplementary Figures

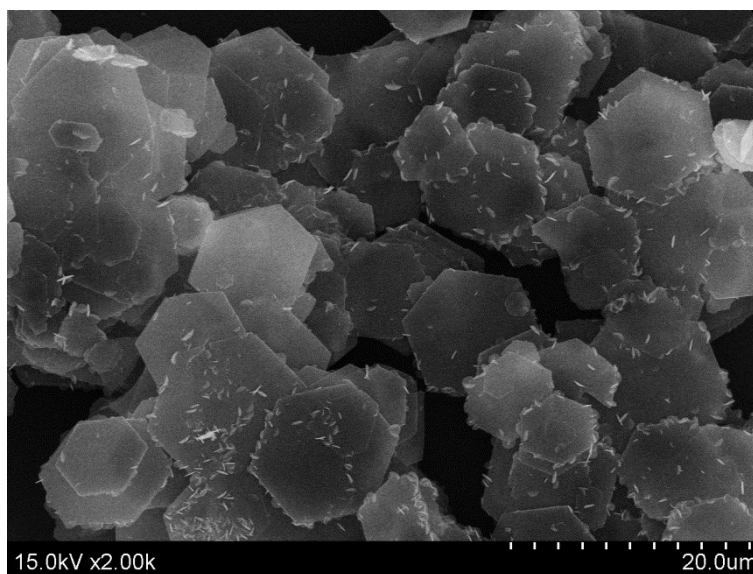

Fig. S1 SEM image of ZnAl-LDO.

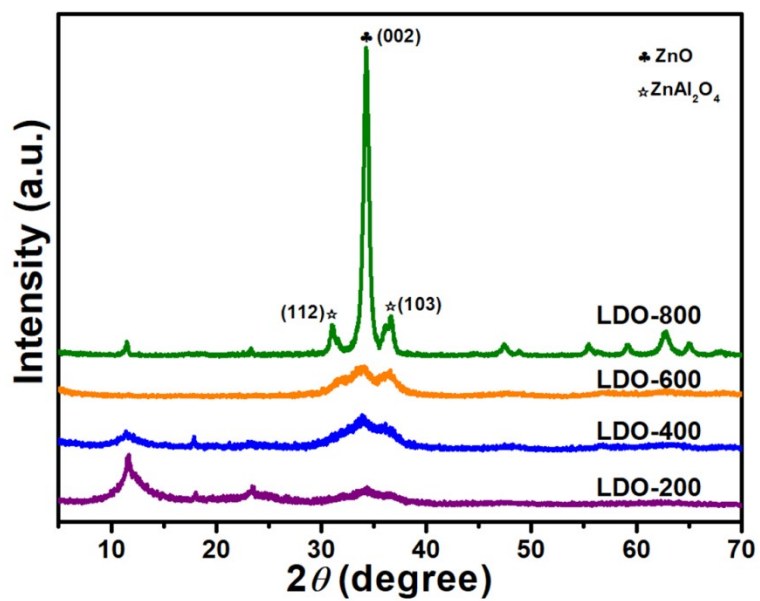

Fig. S2 XRD patterns of ZnAl-LDO-*T* samples.

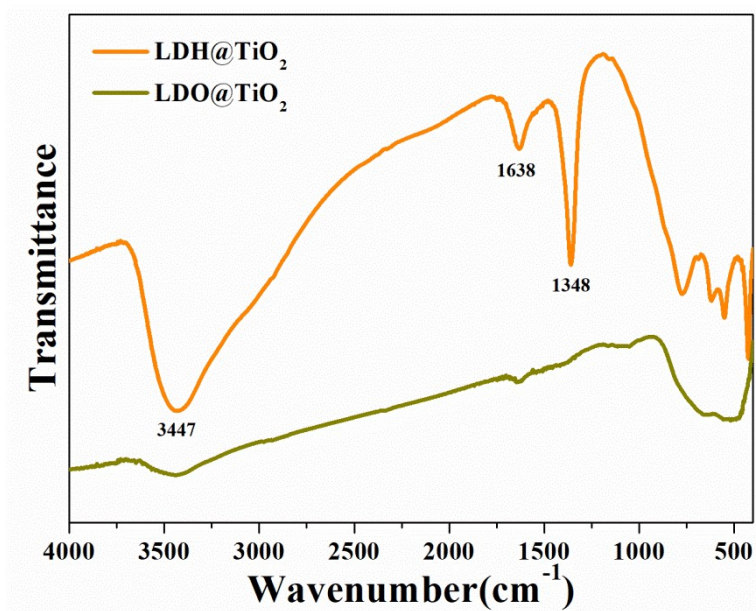

Fig. S3 The infrared spectroscopy of LDH@TiO<sub>2</sub> and LDO@TiO<sub>2</sub>.

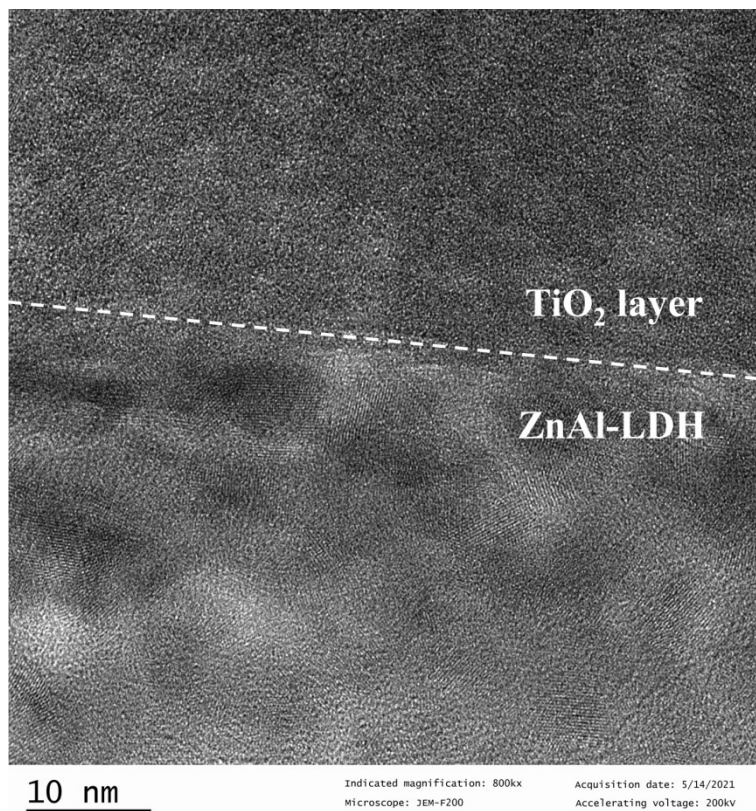

Fig. S4 HRTEM image of a sliced LDH@TiO<sub>2</sub> core-shell nanosheet.

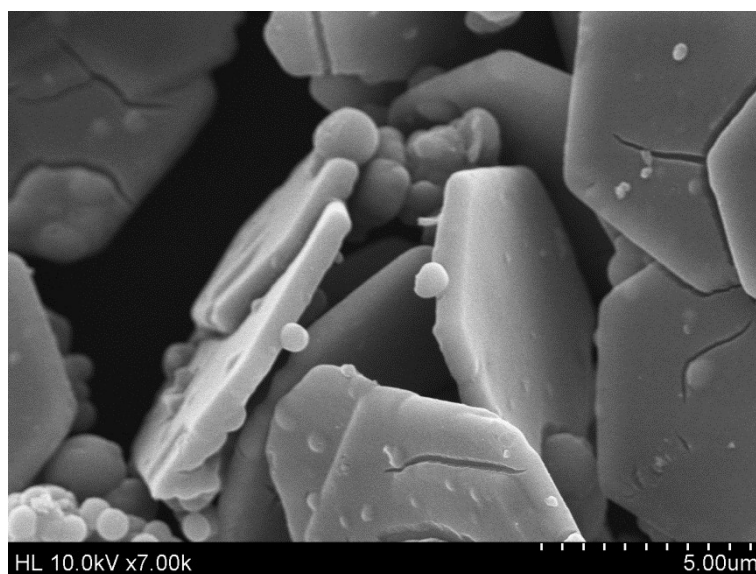

Fig. S5 SEM image of LDH@TiO<sub>2</sub>-H.

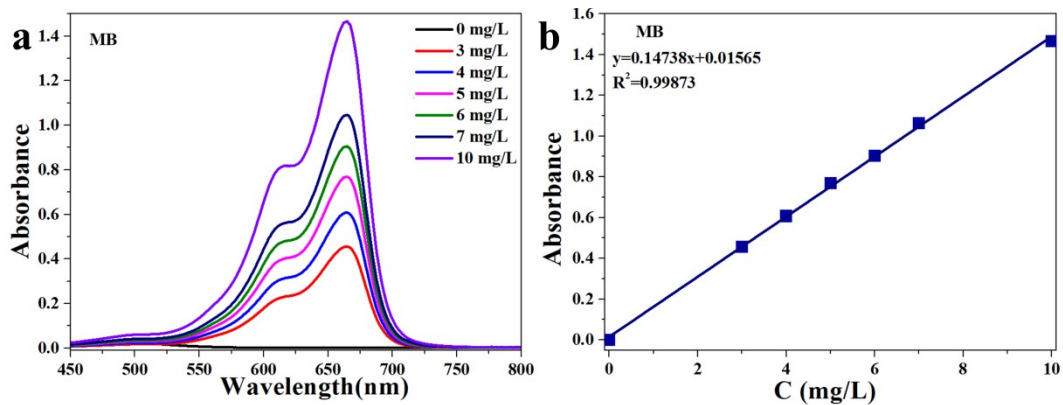

Fig. S6 (a) UV-vis spectra and (b) the corresponding standard concentration line of MB solutions.

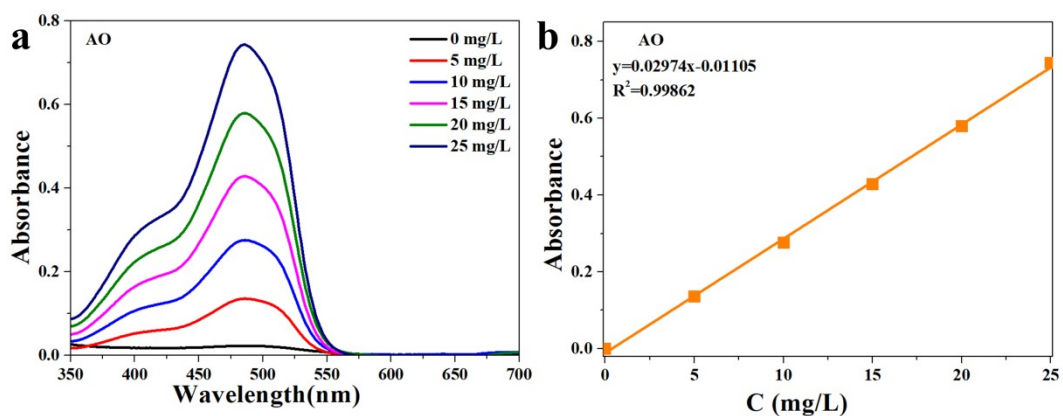

Fig. S7 (a) UV-vis spectra and (b) the corresponding standard concentration line of AO solutions.

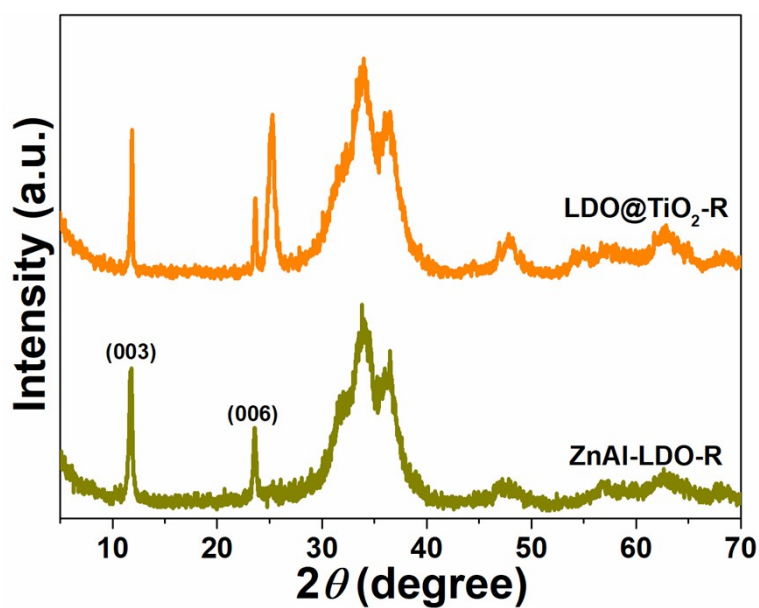

Fig. S8 XRD patterns of ZnAl-LDO-R and LDO@TiO<sub>2</sub>-R samples.

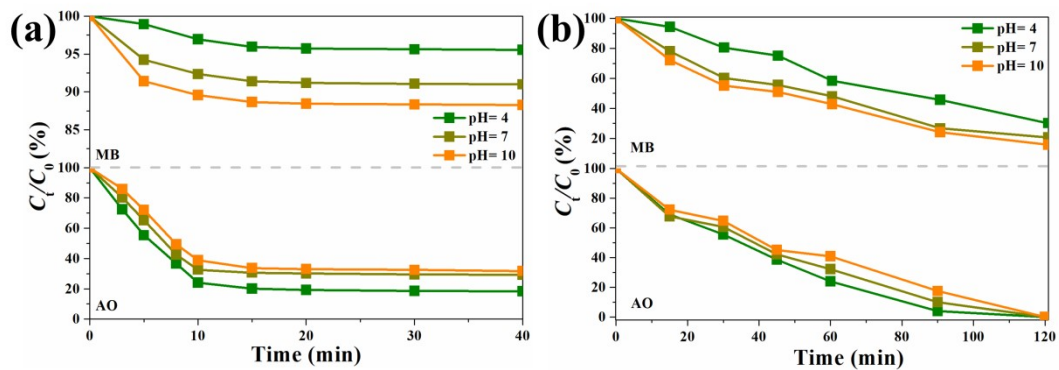

Fig. S9 (a) Absorption percentage and (b) photodegradation efficiency of MB and AO for LDO@TiO<sub>2</sub> at various pH values.

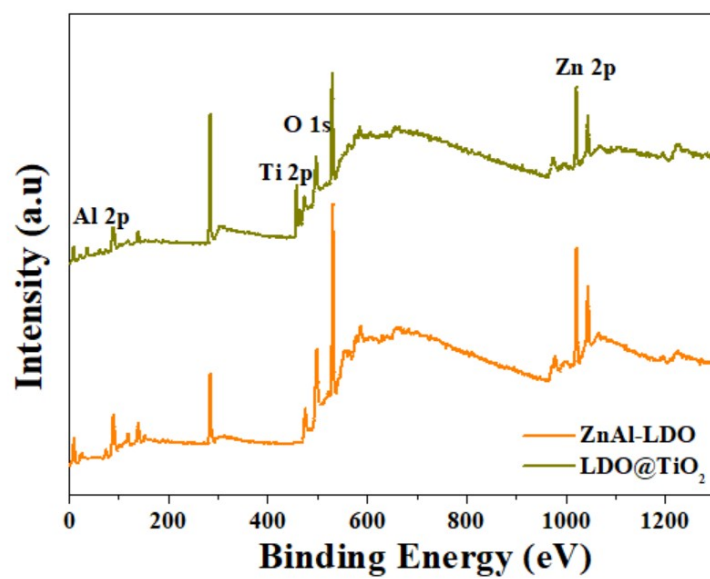

Fig. S10 The full-scale XPS pattern of ZnAl-LDO and LDO@TiO<sub>2</sub>.

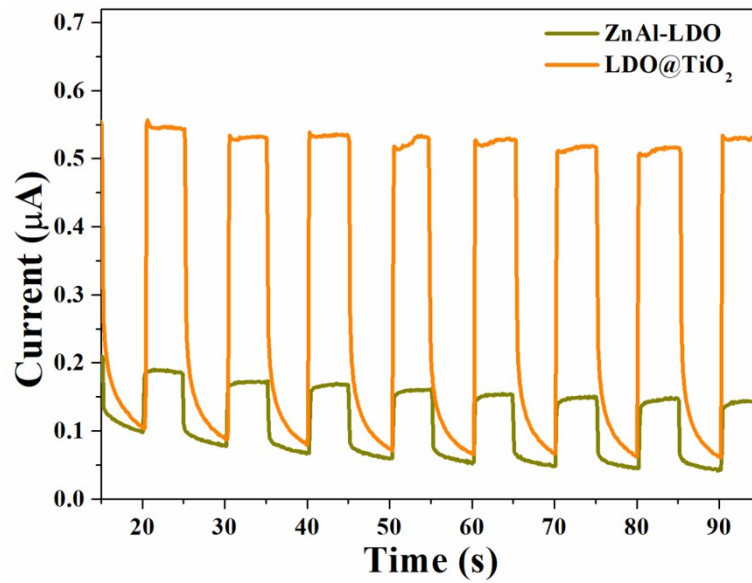

Fig. S11 The photocurrents of ZnAl-LDO and LDO@TiO<sub>2</sub> samples under chopped illumination.

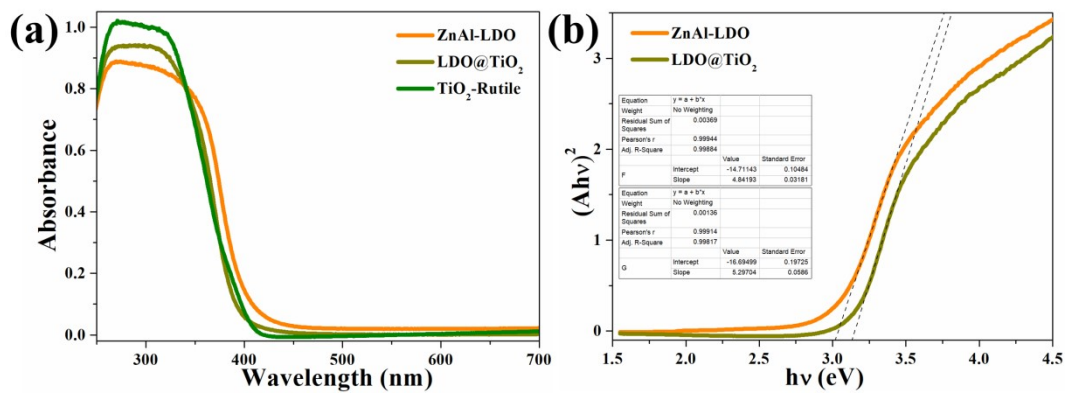

Fig. S12 (a) UV-vis diffuse-reflectance spectra and (b) band gap energy of ZnAl-LDO and LDO@TiO<sub>2</sub>.

Tab. S1 The photodegradation performance in reported works

| Photocatalysts                                            | Light                                                                        | Dosage | MB                | AO                | Degradation       | Ref          |
|-----------------------------------------------------------|------------------------------------------------------------------------------|--------|-------------------|-------------------|-------------------|--------------|
| g-C <sub>3</sub> N <sub>4</sub> /TiO <sub>2</sub>         | UV lamp                                                                      | 25mg   | 10mg/L<br>(100mL) | —                 | 79.9%<br>(180min) | [1]          |
| g-C <sub>3</sub> N <sub>4</sub> /ZnO                      | 250W UV lamp<br>$\lambda_{\max}= 365$ nm                                     | 25mg   | 10mg/L<br>(50mL)  | —                 | 100%<br>(60min)   | [2]          |
| g-C <sub>3</sub> N <sub>4</sub> /TiO <sub>2</sub>         | 30W visible<br>light lamp                                                    | 200mg  | —                 | 10mg/L<br>(500mL) | 100%<br>(300min)  | [3]          |
| TiO <sub>2</sub> sphere-S                                 | Xenon lamp<br>100mWcm <sup>-2</sup>                                          | 20mg   | —                 | 30mg/L<br>(50mL)  | 100%<br>(40min)   | [4]          |
| CFs/TiO <sub>2</sub> /<br>Bi <sub>2</sub> WO <sub>6</sub> | 300W Xenon<br>lamp                                                           | 150mg  | —                 | 10mg/L<br>(50mL)  | 100%<br>(60min)   | [5]          |
| P25                                                       | 150W halogen<br>lamp                                                         | 20mg   | 10mg/L<br>(100mL) | —                 | 60.2%<br>(120min) | [6]          |
| P25                                                       | UV lamp                                                                      | 150mg  | 10mg/L<br>(300mL) | —                 | 81.4%<br>(100min) | [7]          |
| P25                                                       | eight tubular<br>light sources<br>(3.2 mW cm <sup>-2</sup><br>360 to 380 nm) | 25mg   | —                 | 5mg/L<br>(100mL)  | 100%<br>(30min)   | [8]          |
| P25                                                       | two fluorescent<br>lamps Sylvania<br>11W                                     | 200mg  | —                 | 35mg/L<br>(100mL) | 25%<br>(120min)   | [9]          |
| LDO@TiO <sub>2</sub>                                      | Xenon lamp                                                                   | 50mg   | 10mg/L<br>(100mL) | —                 | 87.1%<br>(120min) | This<br>work |
|                                                           |                                                                              | 50mg   | —                 | 25mg/L<br>(100mL) | 100%<br>(120min)  |              |

## References

- [1] P. Gao, A. Li, D. Sun and W. Ng, *J. Hazard. Mater.*, 2014, **279**, 96–104.
- [2] B. Ren, T. Wang, G. Qu, F. Deng, D. Liang, W. Yang and M. Liu, *Environ. Sci. Pollut. Res.*, 2018, **25**, 19122–19133.
- [3] P. Gündoğmus, J. Park and A. Öztürk, *Ceram. Int.*, 2020, **46**, 21431–21438.
- [4] Y. Zhang, Y. Sun, M. Li, S. Luo, B. Dorus, M. Lu and Q. Sun., *J. Alloys Compounds*, 2021, **890**, 161744.

- [5] J. Miao, X. Zhao, Y.-X. Zhang, Z.-L. Lei and Z.-H. Liu, *Appl. Clay Sci.*, 2021, **207**, 106093.
- [6] J. Romao and G. Mul. *ACS Catal.*, 2016, **6**, 1254–1262.
- [7] P. Xu, Xi. Shen, L. Luo, Z. Shi, Z. Liu, Z. Chen, M. Zhu and L. Zhang, *Environ. Sci.: Nano*, 2018, **5**, 327–337.
- [8] F. Bekena and D. Kuo, *Mat. Sci. Semicon. Proc.*, 2020, **116** 105152.
- [9] S. M. Tichapondwa, J. P. Newman and O. Kubheka, *Phys. Chem. Earth.*, 2020, **118**, 102900.
